1 **Diversity of culturable actinobacteria producing protease inhibitors isolated from**  
2 **the intertidal zones of Maharashtra, India**

3

4 **Neha Shintre<sup>1</sup>, Ulfat Baig<sup>2</sup>, Anagha Pund<sup>2</sup>, Rajashree Patwardhan<sup>3</sup>, Vaijayanti**  
5 **Tamhane<sup>4</sup>, Neelima Deshpande<sup>1</sup>**

6 <sup>1</sup>Department of Microbiology, M.E.S. Abasaheb Garware College, Karve Road, Pune  
7 411004, Maharashtra, India.

8 <sup>2</sup>Indian Institute of Science Education and Research, Pune (IISER-P), Dr. Homi Bhabha  
9 Road, Pashan, Pune 411008, Maharashtra, India.

10 <sup>3</sup>Department of Microbiology, Haribhai V. Desai College of Commerce, Arts and Science,  
11 Pune – 411002, Maharashtra, India H. V. Desai College, Pune

12 <sup>4</sup>Institute of Bioinformatics and Biotechnology, Savitribai Phule Pune University, Pune –  
13 411007, Maharashtra, India

14

15 Corresponding authors: N. Deshpande (email: [neelimapune@gmail.com](mailto:neelimapune@gmail.com) )

16

17 ORCID ID: N. Shintre (0000-0002-6201-9407)

18

19 *Keywords:* marine actinobacteria; molecular phylogeny; protease inhibitors; chemical ecology

20

21 ABSTRACT

22 Phylogenetic diversity of culturable actinobacteria isolated from the intertidal regions of west  
23 coast of Maharashtra, India was studied using 16S rRNA gene sequencing. Total of 140  
24 actinobacterial isolates were obtained, which belonged to 14 genera, 10 families and 65 putative  
25 species with *Streptomyces* being the most dominant (63%) genus followed by *Nocardiopsis*  
26 and *Micromonospora*. They were screened for production of extracellular protease inhibitors  
27 (PI) against three pure proteases viz. chymotrypsin, trypsin, subtilisin and one crude  
28 extracellular protease from *Pseudomonas aeruginosa*. Eighty percent of the isolates showed PI  
29 activity against at least one of the four proteases, majority of them belonged to genus  
30 *Streptomyes*. Actinobacterial diversity from two sites Ade (17°52' N, 73°04' E) and Harnai  
31 (17°48' N, 73°05' E) with varying degree of anthropological pressure showed that more putative  
32 species diversity was obtained from site with lower human intervention i.e Ade (Shannon's H  
33 3.45) than from Harnai (Shannon's H 2.83), a site with more human intervention. Further, in  
34 Ade percentage of isolates not showing PI activity against any of the proteases was close to  
35 21% and that in Harnai was close to 9%. Considering human activities in the coastal region  
36 might be contributing to increasing the organic load and in turn increasing the presence of  
37 extracellular enzymes in the intertidal environments it would be interesting to look at the  
38 association of PI production and organic load in these habitats.

39

## 40 INTRODUCTION

41 Proteases are enzymes that catalyse proteolytic reactions and are involved in variety of  
42 biological processes like digestion, cell signalling or tumour formation (Groll et al., 2002;  
43 Koblinski et al., 2000; Overall and Blobel, 2007; Roberts et al., 2012). They are ubiquitously  
44 present across different plant, animal and microbial taxa. Two of the many roles of these  
45 enzymes in bacteria is to aid in bacterial pathogenesis (Ingmer and Brøndsted, 2009; Maeda,  
46 1996) and bacterial predation (Martin, 2002) where they secrete hydrolytic enzymes in order  
47 to degrade prey species in the vicinity (Martin, 2002). Protease inhibitors bind reversibly or  
48 irreversibly with the enzymes, rendering them inactive. Hence, protease inhibitors (PIs) play a  
49 crucial role as defence molecules in intracellular or extracellular environment. They are  
50 classified based on either the type of protease they inhibit (e.g. serine protease inhibitor, aspartic  
51 protease inhibitor) or based on the mechanism of action (e.g. reversible or irreversible enzyme  
52 inhibitors). Various plants, animals and microorganisms produce PIs in order to deter pests and  
53 predators or secrete them as toxins for self-defence (Habib and Fazili, 2007; Hartl et al., 2011;  
54 Mourão and Schwartz, 2013). Also, PIs have high commercial potential since they are used as  
55 drugs against viral, bacterial and other parasitic infections (Karthik et al., 2014; Liu et al., 2012;  
56 Sreedharan and Bhaskara Rao, 2017; Umezawa, 1976).

57 Marine intercostal community harbours a variety of sedentary invertebrates and  
58 microorganisms. These organisms rely primarily on chemicals for self-defence (Engel et al.,  
59 2002; Pawlik, 1993). Additionally, as stated by Hay *et al.* the “biggest challenge for marine  
60 organisms is to obtain lunch without becoming lunch” (Hay, 2009). Protease inhibitors can  
61 play a major role in these situations since they can inhibit the action of digestive proteases  
62 present in the surroundings. Literature reports suggest that PIs are indeed produced by marine  
63 intercostal communities (Covalada et al., 2012; Karthik and Kirthi, 2015; Karthik et al., 2014;

64 Mourão and Schwartz, 2013) considering these facts, it might be possible to detect PIs  
65 synthesised by marine microorganisms for their defence.

66 Intertidal zones are exposed to air at low tides and are submerged at high tides. Thus they  
67 experience varying dry and wet periods, fluctuating temperatures and atmospheric pressure.  
68 Intertidal life forms adapt to these constantly changing environment by developing unique  
69 features. Their adaptations for survival in dynamic environments might also increase the  
70 chances of finding unique set of metabolites from them. . Moreover, it is expected that marine  
71 microorganisms will have different set of defence molecules than their terrestrial counterparts  
72 (Mourão and Schwartz, 2013; Xie et al., 2018).

73 Actinobacteria is one of the largest phyla in domain bacteria. These are gram positive organisms  
74 with high guanine to cytosine ratio (Trujillo, 2016). They at large are known to produce  
75 commercially important diverse metabolites. Some reports show that the marine environment  
76 has become a prime source for discovery of novel actinobacteria and novel natural products  
77 produced by them (Maldonado et al., 2005; Ward and Bora, 2006). There are few recent reports  
78 of PI production by marine actinobacteria (Karthik et al., 2014; Sreedharan and Bhaskara Rao,  
79 2017; Sun et al., 2014) yet, to our knowledge, there are limited reports on PIs from west coast  
80 of India. Thus, in the current study, marine actinobacteria from intertidal zone were screened  
81 for presence of PIs.

82 It has been reported that sponges and bacteria are two main sources of enzyme inhibitors from  
83 marine environments (Ruocco et al., 2017). Some reports also suggest that many a times,  
84 metabolites obtained from sponges are actually produced by the bacterial symbionts (Haygood  
85 et al., 1999; Mehbub et al., 2014). Therefore, in the current study sponge, sediment and water  
86 samples were collected from the coast of Maharashtra and Goa for isolation of actinobacteria.  
87 Obtained isolates were subjected to molecular identification using 16S rRNA gene sequencing

88 and isolates were screened for presence of protease inhibitors. Data was analysed to check  
89 correlations between inhibitor molecules and environmental parameters and their probable role  
90 as defence molecules.

## 91 MATERIALS AND METHODS

92

### 93 *Sampling*

94 Around 60 samples comprising of sponge, sediment and sea water were collected from the  
95 intertidal rock pools from seven different locations along the coast of Ratnagiri district from  
96 Velas, Kelshi, Ade, Anjarle, Harnai, Murud and Aare Ware. (17°57'04.9"N 73°01'43.0"E to  
97 17°04'35.9"N 73°17'17.5"E). From Ade and Harnai, sampling was carried out in different  
98 seasons viz. pre monsoon (Mar, Apr, May), Monsoon (Early Sep), post-monsoon (Oct) and  
99 winter season (Dec, Jan, Feb). Whereas, a single sampling was done from rest of the sites. Sub-  
100 tidal sampling of sediment was also done in a single event at a place off shore to Goa  
101 (15°21'08.4"N 73°46'41.8"E). The depths of collection for this sampling were 9m, 11m, 12m  
102 and 16m. (Figure 1).

103 Small tissue samples of sponge were collected without damaging the sponge colonies or their  
104 habitat. Samples were rinsed in sterile Poor Ravan Saline (PRS) broth to remove loosely bound  
105 particles and debris and were stored in sterile collection tubes containing the same medium.  
106 Sediment and water samples in the vicinity of sponge were collected in sterile collection tubes.  
107 All the samples were transported to the laboratories in ice box and were processed fresh for  
108 microbial isolations.

### 109 *Sample Processing, Selective Isolation and Culture Maintenance*

110 All the samples were given heat treatment at 60°C for 15 mins to reduce the load of non-  
111 sporulating bacteria. Sponge samples were homogenised in Poor Ravan Saline (PRS) medium

112 (Watve et al., 2000) and diluted serially with 10 fold dilutions up to  $10^{-5}$ . Sediment samples  
113 were vigorously shaken for two minutes and diluted up to  $10^{-5}$  dilutions. Sea water samples  
114 were also diluted up to  $10^{-5}$  dilutions. 0.1 ml of undiluted,  $10^{-3}$  and  $10^{-5}$  dilutions were spread  
115 plated in triplicates on different growth media and incubated at room temperature for up to 21  
116 days.

117 Four different growth media Sponge agar (1% macerated sponge colonies collected from the  
118 site, 50% sea water and 2.5% agar), Sea Water Agar (50% sea water and 2.5% agar), ZOBELL  
119 Marine Agar (ZOBELL, 1941) and Modified poor ravan medium (Watve et al., 2000)) were  
120 used to obtain maximum culture dependent diversity of actinobacteria. Nalidixic acid and  
121 Cyclohexamide were added to the culture medium in  $25 \mu\text{g ml}^{-1}$  concentration to inhibit the  
122 growth of Gram-negative bacteria and fungi (Magarvey et al., 2004). Plates were incubated at  
123  $30^{\circ}\text{C}$  and monitored daily for 21 days. Isolated colonies showing resemblance to typical  
124 actinobacterial colony morphology were picked up and subcultured several times for obtaining  
125 pure cultures. All the pure cultures were later stored on modified (1:4 diluted) ZOBELL marine  
126 agar at  $4^{\circ}\text{C}$  for further use.

### 127 *DNA Sequencing and Diversity Analysis*

128 16S rRNA sequences from previous study of (Baig et al., 2020) were used to make maximum  
129 likelihood phylogenetic tree of actinobacteria used in the study. Maximum likelihood tree was  
130 constructed in IQtree (Nguyen et al., 2015). Best nucleotide substitution model was determined  
131 in model finder (Kalyaanamoorthy et al., 2017). Note support was examined using bootstrap  
132 values of 1000 iterations and *Bacillus sp.* were used as out-group. Shannon's diversity index to  
133 measure species diversity of actinobacteria was calculated using Past (version 4.0) (Hammer,  
134 2001).

### 135 *Screening for Protease Inhibitors (PI) using spot assay*

136 ***Sample preparation***

137 Detection of extracellular PIs from cell free supernatant was done as follows. Pure cultures of  
138 actinobacteria were inoculated (single colony in 150 ml broth) in ZOBELL Marine broth and  
139 incubated for 5 days at 30°C on incubator shaker with 100 rpm speed. After incubation, the  
140 cultures were centrifuged at 4000 rpm for 20 mins and cell free supernatants (CFS) were  
141 collected. 1 ml of each of these CFSs were kept in hot water bath of 70°C for 15 mins for  
142 denaturation of proteases produced by the bacteria. Heat treated CFSs were used for detection  
143 of PIs. Unprocessed X-ray films coated with gelatine were used to detect PIs. (Gelatine is  
144 degraded by various proteolytic enzymes, so, upon action of the proteases, clear zones are  
145 observed on unprocessed x-ray films at the point of contact of enzymes. On the other hand, if  
146 the gelatine layer remains intact, no clearance is observed. PIs inactivate proteases and thus,  
147 presence of protease inhibitors is marked by no clearance on the x-ray films as shown in Figure  
148 3).

149 Proteases used for the assay included Trypsin (SRL Pvt. Ltd, Cat no.- 60484) and  $\alpha$ -  
150 Chymotrypsin (SRL Pvt. Ltd, Cat no.- 35085) of bovine origin and Subtilisin (Sigma-Aldrich,  
151 Cat no.- P5380) and crude protease obtained in the laboratory from cell free supernatant of  
152 *Pseudomonas aeruginosa* (NCBI Accession number - MN044759) of bacterial origin were  
153 used to detect PIs. Amongst these enzymes, trypsin and chymotrypsin were of bovine origin.  
154 Additionally, Protease inhibitor cocktail (Sigma-Aldrich, Cat no.- P5380) was used as a  
155 positive control and un-inoculated culture broth incubated with the enzyme was used as a  
156 negative control.

157 ***Spot assay***

158 Standardization of enzyme concentration was done as described by Tripathi et al.,  
159 (2011). Various dilutions of pure enzyme were spotted on gelatine coated X-ray films. Lowest

160 dilution that gave complete clearance, in turn indicating complete digestion of gelatine, was  
161 used in the assay.

162 Spot assay as described by (Cheung et al., 1991) for detection of PIs was carried out as follows.  
163 10 µl of pure enzyme (100 µg ml<sup>-1</sup>) was incubated with 10 µl of heat treated CFS for 10 mins  
164 and then transferred to untreated X-ray-Fuji Medical X-ray, HRU grade-films. The assembly  
165 was kept undisturbed for 15 mins at room temperature to allow the enzyme substrate reaction  
166 to take place. Films were washed with running tap water and allowed to dry before recording  
167 the results.

## 168 RESULTS

169

### 170 *Sample Collection*

171

172 A single sampling of sediment and water was carried out from intertidal and sub-tidal regions  
173 of Aare Ware and Goa respectively. Similarly, one time sampling was carried out from  
174 intertidal zones of Velas, Kelshi, Anjarle and Murud however, at the time of sampling, sponge  
175 colonies could not be located on any of these sites and thus only sediment and water samples  
176 were collected. Whereas, at Harnai and Ade four to five distinct morphotypes of sponges were  
177 recorded. Thus, sponge sediment and water samples were collected from these sites. These  
178 sites were also selected for sampling in various seasons throughout the year. Harnai, one of the  
179 busy ports on the western coast is used for various activities like, auction of fishes on a daily  
180 basis, recreational space for the villagers or tourist hang out spot. Certain parts of intertidal rock  
181 patch in the vicinity are used as open defecation sites by the villagers and few other parts of the  
182 rock patch are used for clam collection and fishing from the rock pools. Conversely Ade, is  
183 hardly used for any of the above purposes except for occasional fishing from the rock pools.



184 Thus, intertidal regions of the above sites faced varying degree of anthropological disturbance  
 185 with Harnai being the most and Ade being the least used site with respect to human activities.

186 *Distribution, Identification and Phylogeny of Actinobacteria from Sponge, Sediment and Sea*  
 187 *Water Samples*

188 We obtained 140 actinobacterial isolates from sponge, sediment and sea water samples. They  
 189 showed high phylogenetic diversity wherein there were 65 putative species belonging to 14  
 190 genera of 10 different families. Most abundant genus amongst the isolates was *Streptomyces*  
 191 *sp.* (~63%) followed by *Nocardiopsis sp.* (~22%) and *Micromonospora sp.* (~4%).  
 192 Approximately 11% isolates belonged to other genera (Table 1).

193

194 **Table 1:** Counts of putative species obtained from sponge, sediment and sea water samples

| Family                              | Genus               | Putative species identity           | Isolates |
|-------------------------------------|---------------------|-------------------------------------|----------|
| <i>Actinomycetaceae</i>             | <i>Streptomyces</i> | <i>Streptomyces albidoflavus</i>    | 6        |
|                                     |                     | <i>Streptomyces albogriseolus</i>   | 8        |
|                                     |                     | <i>Streptomyces atrovirens</i>      | 1        |
|                                     |                     | <i>Streptomyces aurantiogriseus</i> | 1        |
|                                     |                     | <i>Streptomyces aureofaciens</i>    | 1        |
|                                     |                     | <i>Streptomyces cellulosa</i>       | 1        |
|                                     |                     | <i>Streptomyces champavatii</i>     | 1        |
|                                     |                     | <i>Streptomyces coeruleofuscus</i>  | 1        |
|                                     |                     | <i>Streptomyces collinus</i>        | 1        |
|                                     |                     | <i>Streptomyces diastaticus</i>     | 3        |
|                                     |                     | <i>Streptomyces euryhalinus</i>     | 4        |
|                                     |                     | <i>Streptomyces fradiae</i>         | 6        |
|                                     |                     | <i>Streptomyces geysiriensis</i>    | 1        |
|                                     |                     | <i>Streptomyces graminearus</i>     | 1        |
|                                     |                     | <i>Streptomyces griseorubens</i>    | 3        |
|                                     |                     | <i>Streptomyces koyangensis</i>     | 1        |
|                                     |                     | <i>Streptomyces longispororuber</i> | 4        |
|                                     |                     | <i>Streptomyces maritimus</i>       | 6        |
|                                     |                     | <i>Streptomyces nigra</i>           | 1        |
|                                     |                     | <i>Streptomyces olivaceus</i>       | 4        |
| <i>Streptomyces prasinosporus</i>   | 1                   |                                     |          |
| <i>Streptomyces pseudogriseolus</i> | 4                   |                                     |          |

|                           |                          |                                         |    |
|---------------------------|--------------------------|-----------------------------------------|----|
|                           |                          | <i>Streptomyces redgersensis</i>        | 1  |
|                           |                          | <i>Streptomyces rochei</i>              | 2  |
|                           |                          | <i>Streptomyces sampsonii</i>           | 3  |
|                           |                          | <i>Streptomyces smyrnaeus</i>           | 1  |
|                           |                          | <i>Streptomyces sp. 102H11-4</i>        | 1  |
|                           |                          | <i>Streptomyces sp. 13650C</i>          | 8  |
|                           |                          | <i>Streptomyces sp. CNS-753</i>         | 1  |
|                           |                          | <i>Streptomyces sp. FZ42</i>            | 1  |
|                           |                          | <i>Streptomyces sp. OAct 12</i>         | 1  |
|                           |                          | <i>Streptomyces sp. OAct 89</i>         | 1  |
|                           |                          | <i>Streptomyces tempisqueus</i>         | 2  |
|                           |                          | <i>Streptomyces tendae</i>              | 2  |
|                           |                          | <i>Streptomyces thermocarboxydus</i>    | 1  |
|                           |                          | <i>Streptomyces variabilis</i>          | 1  |
|                           |                          | <i>Streptomyces viridobrunneus</i>      | 1  |
|                           |                          | <i>Streptomyces xylophagus</i>          | 1  |
| <i>Nocardiopsaceae</i>    | <i>Nocardiopsis</i>      | <i>Nocardiopsis alba</i>                | 21 |
|                           |                          | <i>Nocardiopsis dasonvelli</i>          | 2  |
|                           |                          | <i>Nocardiopsis fildesensis</i>         | 1  |
|                           |                          | <i>Nocardiopsis metallicus</i>          | 3  |
|                           |                          | <i>Nocardiopsis salina</i>              | 1  |
|                           |                          | <i>Nocardiopsis synnematoformis</i>     | 3  |
| <i>Micromonosporaceae</i> | <i>Micromonospora</i>    | <i>Micromonospora chalcea</i>           | 2  |
|                           |                          | <i>Micromonospora maritima</i>          | 1  |
|                           |                          | <i>Micromonospora sp</i>                | 1  |
|                           |                          | <i>Micromonospora tulbaghia</i>         | 1  |
| <i>Nocardiaceae</i>       | <i>Rhodococcus</i>       | <i>Rhodococcus aetherivorans</i>        | 1  |
|                           |                          | <i>Rhodococcus cory</i>                 | 1  |
|                           |                          | <i>Rhodococcus rhodochrous</i>          | 1  |
|                           |                          | <i>Rhodococcus zopfii</i>               | 1  |
| <i>Pseudonocardiaceae</i> | <i>Actinomycetospora</i> | <i>Actinomycetospora Chiangmaiensis</i> | 1  |
|                           |                          | <i>Actinomycetospora straminia</i>      | 1  |
|                           | <i>Pseudonocardia</i>    | <i>Pseudonocardia kongjuensis</i>       | 1  |
| <i>Micrococcaceae</i>     | <i>Glutamicibacter</i>   | <i>Arthrobacter mysoreus</i>            | 1  |
|                           | <i>Kocuria</i>           | <i>Kocuria rosea</i>                    | 1  |
|                           | <i>Micrococcus</i>       | <i>Micrococcus aloeverae</i>            | 1  |
|                           | <i>Rothia</i>            | <i>Rothia terrae</i>                    | 1  |
| <i>Brevibacteriaceae</i>  | <i>Brevibacterium</i>    | <i>Brevibacterium leteolum</i>          | 2  |
| <i>Intrasporangiaceae</i> | <i>Kytococcus</i>        | <i>Kytococcus sedenteris</i>            | 1  |
| <i>Jonesiaceae</i>        | <i>Jonesia</i>           | <i>Jonesia denitrificans</i>            | 1  |
| <i>Microbacteriaceae</i>  | <i>Agrococcus</i>        | <i>Agrococcus carbonis</i>              | 1  |

195

196

197 From sponges, 53 actinobacterial isolates were obtained which belonged to 7 genera and 7  
198 families. Whereas, 70 isolates were obtained from sediments that belonged to 7 different genera  
199 and 7 families. 17 isolates belonging to 8 genera of 7 families were isolated from sea water  
200 (Table 2). Even though, more number of isolates were obtained from sediment, Shannon's  
201 diversity index showed higher putative species diversity in isolates obtained from sponge  
202 (Shannon's H 3.27) than sediment (Shannon's H 2.97) and water (Shannon's H 2.76).

203 **Table 2:** Number of isolates belonging to different families obtained from various sources

| <b>Families</b>           | <b>Sediment</b> | <b>Water</b> | <b>Sponge</b> | <b>Total</b> |
|---------------------------|-----------------|--------------|---------------|--------------|
| <i>Actinomycetaceae</i>   | 47              | 9            | 32            | <b>88</b>    |
| <i>Brevibacteriaceae</i>  | 1               | 1            | -             | <b>2</b>     |
| <i>Intrasporangiaceae</i> | 1               | -            | -             | <b>1</b>     |
| <i>Microbacteriaceae</i>  | -               | 1            | -             | <b>1</b>     |
| <i>Micrococcaceae</i>     | 1               | 1            | 2             | <b>4</b>     |
| <i>Micromonosporaceae</i> | 1               | -            | 4             | <b>5</b>     |
| <i>Nocardiaceae</i>       | 1               | 1            | 2             | <b>4</b>     |
| <i>Nocardiopsaceae</i>    | 18              | 2            | 11            | <b>31</b>    |
| <i>Pseudonocardiaceae</i> | -               | 2            | 1             | <b>3</b>     |
| <i>Jonesiaceae</i>        | -               | -            | 1             | <b>1</b>     |
| <b>Grand total</b>        | <b>70</b>       | <b>17</b>    | <b>53</b>     | <b>140</b>   |

204

205 More number of isolates (67) and more species diversity (10 genera with 43 putative species)  
206 were obtained from anthropologically less disturbed site Ade. Whereas, from Harnai which is  
207 a site with higher disturbance 47 isolates belonging to 25 putative species of 9 genera could be  
208 isolated. (Figure 2). Shannon's diversity index (H) value for Ade was 3.45 and that for Harnai  
209 was 2.83. This indicates that the putative species diversity at Ade is more than diversity at  
210 Harnai.

#### 211 *Production of Protease inhibitors*

212

213 Results of PI production were recorded using spot assay as shown in Figure 3. It was observed  
214 that, PIs retained their activity even after heat treatment at 70°C for 15 mins. Out of 140 isolates

215 used for screening of PIs, 113 isolates showed activity against at least one of the three pure  
 216 proteases used for the study (viz. chymotrypsin, trypsin and subtilisin), whereas 27 isolates  
 217 showed no PI production at all against any of these enzymes. Out of 113 isolates, 37 showed  
 218 some degree of activity against all pure enzymes, of which 8 showed strong positive activity.  
 219 Total of 17, 7 and 9 isolates showed PI activity exclusively against chymotrypsin, trypsin and  
 220 subtilisin respectively (Figure 3). Majority of isolates which showed strong positive activity  
 221 against enzyme chymotrypsin, also showed strong positive activity against subtilisin and  
 222 trypsin. Further, even though 20% of the *Streptomyces* members showed complete absence of  
 223 protease inhibitors, all the isolates showing strong positive activity against all enzymes  
 224 belonged entirely to *Streptomyces* sp. Very few isolates of *Nocardiopsis* sp. showed PI activity  
 225 against subtilisin. Regarding the source, highest number of strong positive isolates (7 out of 8)  
 226 were obtained from the sediments and only 1 was obtained from the sponge. (Figure 2).  
 227 Out of 113 PI producers, strong positive (++) activity was shown by 10, 54, and 27 isolates  
 228 against chymotrypsin, trypsin and subtilisin respectively (Table 3 A). A subset of 90 isolates  
 229 belonging to most common genera viz. *Streptomyces* sp., *Nocardiopsis* sp. and  
 230 *Micromonospora* sp. were chosen to check the activity against another extracellular bacterial  
 231 protease which was obtained from cell free supernatant of *P. aeruginosa*, 36 isolates gave some  
 232 degree of activity against this crude bacterial protease (Table 3B).

233 **Table 3A:** Genus-wise counts of PI producers active against pure proteases  
 234

| Genus                    | Chymotrypsin |   |    | Trypsin |   |    | Subtilisin |   |    | Total    |
|--------------------------|--------------|---|----|---------|---|----|------------|---|----|----------|
|                          | -            | + | ++ | -       | + | ++ | -          | + | ++ |          |
| <i>Actinomycetospora</i> | 0            | 2 | 0  | 1       | 1 |    | 2          | 0 | 0  | <b>2</b> |
| <i>Agrococcus</i>        | 0            | 1 | 0  | 1       | 0 | 0  | 1          | 0 | 0  | <b>1</b> |
| <i>Brevibacterium</i>    | 1            | 1 | 0  | 1       | 1 | 0  | 2          | 0 | 0  | <b>2</b> |
| <i>Glutamicibacter</i>   | 0            | 1 | 0  | 0       | 0 | 1  | 1          | 0 | 0  | <b>1</b> |
| <i>Jonesia</i>           | 0            | 1 | 0  | 1       | 0 | 0  | 1          | 0 | 0  | <b>1</b> |

|                       |           |           |           |           |           |           |           |           |           |            |
|-----------------------|-----------|-----------|-----------|-----------|-----------|-----------|-----------|-----------|-----------|------------|
| <i>Kocuria</i>        | 0         | 1         | 0         | 1         | 0         | 0         | 1         | 0         | 0         | <b>1</b>   |
| <i>Kytococcus</i>     | 0         | 1         | 0         | 0         | 1         | 0         | 1         | 0         | 0         | <b>1</b>   |
| <i>Micrococcus</i>    | 0         | 1         | 0         | 0         | 1         | 0         | 1         | 0         | 0         | <b>1</b>   |
| <i>Micromonospora</i> | 2         | 3         | 0         | 2         | 1         | 2         | 4         | 1         | 0         | <b>5</b>   |
| <i>Nocardiosis</i>    | 6         | 23        | 2         | 17        | 3         | 11        | 27        | 4         | 0         | <b>31</b>  |
| <i>Pseudonocardia</i> | 0         | 1         | 0         | 1         | 0         | 0         | 1         | 0         | 0         | <b>1</b>   |
| <i>Rhodococcus</i>    | 0         | 4         | 0         | 2         | 1         | 1         | 4         | 0         | 0         | <b>4</b>   |
| <i>Rothia</i>         | 0         | 1         | 0         | 0         | 0         | 1         | 1         | 0         | 0         | <b>1</b>   |
| <i>Streptomyces</i>   | 43        | 37        | 8         | 31        | 19        | 38        | 33        | 28        | 27        | <b>88</b>  |
| <b>Total</b>          | <b>52</b> | <b>78</b> | <b>10</b> | <b>58</b> | <b>28</b> | <b>54</b> | <b>80</b> | <b>33</b> | <b>27</b> | <b>140</b> |

235

236 **Table 3B:** Genus-wise counts of PI producers active against crude protease

| Genus                 | Crude <i>P. aeruginosa</i> Protease |           |          | Total     |
|-----------------------|-------------------------------------|-----------|----------|-----------|
|                       | -                                   | +         | ++       |           |
| <i>Micromonospora</i> | 2                                   | 1         | 0        | 3         |
| <i>Nocardiosis</i>    | 3                                   | 4         | 0        | 7         |
| <i>Streptomyces</i>   | 49                                  | 29        | 2        | 80        |
| <b>Grand Total</b>    | <b>54</b>                           | <b>34</b> | <b>2</b> | <b>90</b> |

237

238 *Effect of Season and Anthropological Activities on Production of Protease Inhibitors*

239

240 Least number of actinobacterial isolates were obtained from monsoon and post-monsoon  
 241 seasons and the number of isolates obtained from each sampling increased towards the month  
 242 of May i.e. the pre-monsoon season. Majority of actinobacterial isolates were obtained from  
 243 pre-monsoon season (Figure 4A). From Ade and Harnai, over all, occurrence of inhibitors  
 244 against chymotrypsin and trypsin was more as compared to that against subtilisin (Figure 4B).  
 245 Proportion of isolates not giving PI activity against any of the enzymes was higher in Ade (14  
 246 out of 67 isolates i.e. approximately 21%) compared to that in Harnai (4 isolates out of 47 i.e.  
 247 approximately 19%) (Figure 4C). Thus to summarize, more number of putative species were  
 248 obtained from Ade however, proportion of PI producers from that site was less compared to  
 249 Harnai.

250

251 DISCUSSION:

252 Actinobacteria are widespread in terrestrial and aquatic environments. Many of them also  
253 produce external spores which are resistant to dehydration (Trujillo, 2016). Various reports say  
254 that marine actinobacteria have a high potential for production of biomolecules (Jose and Jha,  
255 2017; Solanki et al., 2008) however, the number of actinobacterial compounds discovered so  
256 far are limited not by the number of compounds produced by them but by the amount of  
257 screening efforts put in (Watve et al., 2001). Many reports have highlighted the need for  
258 studying marine actinomycete diversity and their potential use for obtaining novel metabolites  
259 (Dharmaraj, 2010; Jensen et al., 2005; Lam, 2006; Subramani and Aalbersberg, 2012).  
260 Researchers from India have also isolated actinobacteria from coastal regions of West Bengal  
261 (Peela et al., 2005; Ramesh and Mathivanan, 2009), Gujarat (Jose and Jha, 2017), Tamil Nadu  
262 (Raja et al., 2010; Valli et al., 2012) and Andaman and Nicobar (Karthik et al., 2014) to name  
263 a few for bioprospecting studies. However, there are very few reports of isolation of  
264 actinobacteria and still fewer reports on PI producing actinobacteria from the coast of  
265 Maharashtra. Thus considering these facts, current study focused on isolation of actinobacteria  
266 from coast of Maharashtra and their potential as producers of PIs.

267 *Phylogenetics of Actinobacteria from Intertidal Regions of Maharashtra*

268 From 7 different sites including Ade and Harnai used in the study, high diversity of  
269 actinobacterial species was obtained. Highest number of isolates were obtained from sediment  
270 samples followed by sponge and water samples. Majority of isolates belonged to *Streptomyces*  
271 *sp.* followed by *Nocardiopsis sp.* and *Micromonispora sp.* The observations coincided with  
272 observations of (Jose and Jha, 2017) who worked on the samples obtained from coast of Gujarat  
273 which is situated north of Maharashtra. These findings might suggest that members of above  
274 three genera have adapted well to live in marine environments and show a widespread

275 distribution along the western coast of India. Few earlier reports strongly support the existence  
276 of sponge-specific microbes (Simister et al., 2012; Taylor et al., 2007). In the current study,  
277 higher Shannon index values for sponge associated actinobacteria likely suggests their sponge  
278 specific nature.

### 279 *PI Production by Marine Actinobacteria*

280 Marine actinobacteria are known to produce large number of bioactive molecules like  
281 antimicrobial and anticancer compounds intra- as well as extracellularly (Subramani and  
282 Aalbersberg, 2012), however, it is difficult to understand the strategy of producing extracellular  
283 molecules in the marine ecosystems, since, the molecules secreted outside can be easily diluted  
284 in the surroundings. Endopeptidases like chymotrypsin and trypsin are also secreted  
285 extracellularly by bacteria and invertebrates in the marine environments (Holmström and  
286 Kjelleberg, 1999; Thao et al., 2015). Moreover, reports have shown that coastal waters contain  
287 significant amounts of trypsin-type and chymotrypsin-type endopeptidases (Obayashi and  
288 Suzuki, 2005). Interestingly, results of current study demonstrated that high number of  
289 actinobacteria produced PIs against chymotrypsin and trypsin. Further, more than 80% of  
290 cultured actinobacteria produced extracellular inhibitors against at least one of the four  
291 enzymes and almost 20% isolates showed inhibition against all the enzymes used in the study.

292 The presence of PIs suggests that they are needed for the defence of organisms against exo-  
293 and endoproteases present in the surrounding environment. Moreover, they might be used as  
294 defence molecules against proteases secreted by protists and bacteria.

### 295 *Micro-ecological Dynamics in PI Producing Actinobacteria*

296 In this study, PI producing actinobacteria were obtained from all locations and from samples  
297 collected in all seasons. However, there was a remarkable difference in proportions of PI  
298 producing actinobacteria obtained from sites with varying human disturbance. As seen from

299 Shannon's diversity index, comparatively less disturbed site Ade showed more species  
300 diversity, majority of non-producers of PI were reported from this site. On the contrary, almost  
301 80% isolates obtained from Harnai (which has more human interference and thus chances of  
302 containing higher organic load) were producing PIs. Organic load and presence of extracellular  
303 proteases in the surroundings might be a driving force for production of extracellular PIs.  
304 Therefore, these results can be used as a lead for carrying out studies on a larger expanse to  
305 check correlation of organic load and production of PIs by the marine actinobacteria.

306 Actinobacteria are involved in bacterial predation at oligophilic conditions (Kumbhar et al.,  
307 2014), they might need to produce proteases for killing prey species. Hence, one of the  
308 possibilities of finding high number of PI producers amongst actinobacterial isolates might be  
309 to achieve self-protection so that their own proteases are rendered ineffective against their own  
310 selves. Hence, it would be interesting to check if there is any significant correlation between  
311 production of PI and bacterial predation, (Baig et al., 2020).

312 Through this study we show that extracellular protease inhibitor producing actinobacteria are  
313 abundant in the intertidal zones of west coast of Maharashtra. We hypothesize that this might  
314 have a correlation with extracellular proteases and bacterial load in marine environment.  
315 Understanding the need for production of protease inhibitors by actinomycetes can give  
316 interesting insights into marine microbial ecology and clues for production of novel protease  
317 inhibitors.

#### 318 ACKNOWLEDGEMENT:

319 Financial support for this project was provided by Rajiv Gandhi Science and Technology  
320 Commission under the Maharashtra Gene Bank Program. We thank Dr. Milind Watve and Dr.  
321 Neelesh Dahanukar for their critical comments and suggestions for this manuscript. We also



322 thank Mr. Asim Auti for providing *Pseudomonas aeruginosa* culture and Mr. Chinmay  
323 Kulkarni for assisting in the fieldwork.

324 COMPETING INTERESTS:

325 The authors declare no competing interests.

326 REFERENCES:

327

- 328 1. Baig, U., Dahanukar, N., Shintre, N., Holkar, K., Pund, A., Lele, U., Gujarathi, T., Patel,  
329 K., Jakati, A., Singh, R., et al. (2020). Phylogenetic diversity and activity screening of  
330 cultivable actinobacteria isolated from marine sponges and associated environments from  
331 the western coast of India. *BioRxiv* 2020.01.09.901108.
- 332 2. Cheung, A.L., Ying, P., and Fischetti, V.A. (1991). A method to detect proteinase  
333 activity using unprocessed X-ray films. *Anal. Biochem.* 193, 20–23.
- 334 3. Covaleda, G., Rivero, M.A. del, Chávez, M.A., Avilés, F.X., and Reverter, D. (2012).  
335 Crystal Structure of Novel Metalloprotease Inhibitor from Marine Mollusk  
336 *Nerita versicolor* in Complex with Human Carboxypeptidase A4. *J. Biol. Chem.* 287,  
337 9250–9258.
- 338 4. Dharmaraj, S. (2010). Marine Streptomyces as a novel source of bioactive substances.  
339 *World J. Microbiol. Biotechnol.* 26, 2123–2139.
- 340 5. Engel, S., Jensen, P.R., and Fenical, W. (2002). Chemical Ecology of Marine Microbial  
341 Defense. *J. Chem. Ecol.* 28, 1971–1985.
- 342 6. Groll, U. von, Berger, D., and Altmann, T. (2002). The Subtilisin-Like Serine Protease  
343 SDD1 Mediates Cell-to-Cell Signaling during Arabidopsis Stomatal Development. *Plant*  
344 *Cell* 14, 1527–1539.
- 345 7. Habib, H., and Fazili, K.M. (2007). Plant protease inhibitors: a defense strategy in plants.  
346 p.
- 347 8. Hammer, Ø., Harper, D.A.T., Ryan, P.D. 2001. PAST: Paleontological statistics software  
348 package for education and data analysis. *Palaeontologia Electronica* 4(1): 9pp.
- 349 9. Hartl, M., Giri, A.P., Kaur, H., and Baldwin, I.T. (2011). The multiple functions of plant  
350 serine protease inhibitors: defense against herbivores and beyond. *Plant Signal. Behav.* 6,  
351 1009–1011.
- 352 10. Hay, M.E. (2009). Marine Chemical Ecology: Chemical Signals and Cues Structure  
353 Marine Populations, Communities, and Ecosystems. *Annu. Rev. Mar. Sci.* 1, 193–212.

- 354 11. Haygood, M.G., Schmidt, E.W., Davidson, S.K., and Faulkner, D.J. (1999). Microbial  
355 symbionts of marine invertebrates: opportunities for microbial biotechnology. *J. Mol.*  
356 *Microbiol. Biotechnol.* *1*, 33–43.
- 357 12. Holmström, C., and Kjelleberg, S. (1999). Marine *Pseudoalteromonas* species are  
358 associated with higher organisms and produce biologically active extracellular agents.  
359 *FEMS Microbiol. Ecol.* *30*, 285–293.
- 360 13. Ingmer, H., and Brøndsted, L. (2009). Proteases in bacterial pathogenesis. *Res.*  
361 *Microbiol.* *160*, 704–710.
- 362 14. Jensen, P.R., Mincer, T.J., Williams, P.G., and Fenical, W. (2005). Marine actinomycete  
363 diversity and natural product discovery. *Antonie Van Leeuwenhoek* *87*, 43–48.
- 364 15. Jose, P.A., and Jha, B. (2017). Intertidal marine sediment harbours Actinobacteria with  
365 promising bioactive and biosynthetic potential. *Sci. Rep.* *7*, 1–15.
- 366 16. Kalyaanamoorthy, S., Minh, B.Q., Wong, T.K.F., Haeseler, A. von, and Jermin, L.S.  
367 (2017). ModelFinder: fast model selection for accurate phylogenetic estimates. *Nat.*  
368 *Methods* *14*, 587–589.
- 369 17. Karthik, L., and Kirthi, Av. (2015). Protease inhibitors from marine organisms. In  
370 *Antimicrobials*, (CRC Press), pp. 175–188.
- 371 18. Karthik, L., Kumar, G., Keswani, T., Bhattacharyya, A., Chandar, S.S., and Rao, K.V.B.  
372 (2014). Protease Inhibitors from Marine Actinobacteria as a Potential Source for  
373 Antimalarial Compound. *PLOS ONE* *9*, e90972.
- 374 19. Koblinski, J.E., Ahram, M., and Sloane, B.F. (2000). Unraveling the role of proteases in  
375 cancer. *Clin. Chim. Acta* *291*, 113–135.
- 376 20. Kumbhar, C., Mudliar, P., Bhatia, L., Kshirsagar, A., and Watve, M. (2014). Widespread  
377 predatory abilities in the genus *Streptomyces*. *Arch. Microbiol.* *196*, 235–248.
- 378 21. Lam, K.S. (2006). Discovery of novel metabolites from marine actinomycetes. *Curr.*  
379 *Opin. Microbiol.* *9*, 245–251.
- 380 22. Liu, X., Gan, M., Dong, B., Zhang, T., Li, Y., Zhang, Y., Fan, X., Wu, Y., Bai, S., Chen,  
381 M., et al. (2012). 4862F, a new inhibitor of HIV-1 protease, from the culture of  
382 *Streptomyces* I03A-04862. *Mol. Basel Switz.* *18*, 236–243.
- 383 23. Maeda, H. (1996). Role of Microbial Proteases in Pathogenesis. *Microbiol. Immunol.* *40*,  
384 685–699.
- 385 24. Magarvey, N.A., Keller, J.M., Bernan, V., Dworkin, M., and Sherman, D.H. (2004).  
386 Isolation and characterization of novel marine-derived actinomycete taxa rich in  
387 bioactive metabolites. *Appl. Environ. Microbiol.* *70*, 7520–7529.
- 388 25. Maldonado, L.A., Stach, J.E.M., Pathom-aree, W., Ward, A.C., Bull, A.T., and  
389 Goodfellow, M. (2005). Diversity of cultivable actinobacteria in geographically  
390 widespread marine sediments. *Antonie Van Leeuwenhoek* *87*, 11–18.

- 391 26. Martin, M.O. (2002). Predatory prokaryotes: an emerging research opportunity. *J. Mol.*  
392 *Microbiol. Biotechnol.* *4*, 467–477.
- 393 27. Mehbub, M.F., Lei, J., Franco, C., and Zhang, W. (2014). Marine sponge derived natural  
394 products between 2001 and 2010: trends and opportunities for discovery of bioactives.  
395 *Mar. Drugs* *12*, 4539–4577.
- 396 28. Mourão, C.B.F., and Schwartz, E.F. (2013). Protease Inhibitors from Marine Venomous  
397 Animals and Their Counterparts in Terrestrial Venomous Animals. *Mar. Drugs* *11*,  
398 2069–2112.
- 399 29. Nguyen, L.-T., Schmidt, H.A., von Haeseler, A., and Minh, B.Q. (2015). IQ-TREE: A  
400 Fast and Effective Stochastic Algorithm for Estimating Maximum-Likelihood  
401 Phylogenies. *Mol. Biol. Evol.* *32*, 268–274.
- 402 30. Obayashi, Y., and Suzuki, S. (2005). Proteolytic enzymes in coastal surface seawater:  
403 Significant activity of endopeptidases and exopeptidases. *Limnol. Oceanogr.* *50*, 722–  
404 726.
- 405 31. Overall, C.M., and Blobel, C.P. (2007). In search of partners: linking extracellular  
406 proteases to substrates. *Nat. Rev. Mol. Cell Biol.* *8*, 245–257.
- 407 32. Pawlik, J.R. (1993). Marine invertebrate chemical defenses. *Chem. Rev.* *93*, 1911–1922.
- 408 33. Peela, S., Kurada, V.B., and Terli, R. (2005). Studies on antagonistic marine  
409 actinomycetes from the Bay of Bengal. *World J. Microbiol. Biotechnol.* *21*, 583–585.
- 410 34. Raja, S., Ganesan, S., Sivakumar, K., and Thangaradjou, T. (2010). Screening of marine  
411 actinobacteria for amylase enzymes inhibitors. *Indian J. Microbiol.* *50*, 233–237.
- 412 35. Ramesh, S., and Mathivanan, N. (2009). Screening of marine actinomycetes isolated  
413 from the Bay of Bengal, India for antimicrobial activity and industrial enzymes. *World J.*  
414 *Microbiol. Biotechnol.* *25*, 2103–2111.
- 415 36. Roberts, I.N., Caputo, C., Criado, M.V., and Funk, C. (2012). Senescence-associated  
416 proteases in plants. *Physiol. Plant.* *145*, 130–139.
- 417 37. Ruocco, N., Costantini, S., Palumbo, F., and Costantini, M. (2017). Marine Sponges and  
418 Bacteria as Challenging Sources of Enzyme Inhibitors for Pharmacological Applications.  
419 *Mar. Drugs* *15*.
- 420 38. Simister, R.L., Deines, P., Botté, E.S., Webster, N.S., and Taylor, M.W. (2012). Sponge-  
421 specific clusters revisited: a comprehensive phylogeny of sponge-associated  
422 microorganisms. *Environ. Microbiol.* *14*, 517–524.
- 423 39. Solanki, R., Khanna, M., and Lal, R. (2008). Bioactive compounds from marine  
424 actinomycetes. *Indian J. Microbiol.* *48*, 410–431.
- 425 40. Sreedharan, V., and Bhaskara Rao, K.V. (2017). Efficacy of protease inhibitor from  
426 marine *Streptomyces* sp. VITBVK2 against *Leishmania donovani* - An in vitro study.  
427 *Exp. Parasitol.* *174*, 45–51.

- 428 41. Subramani, R., and Aalbersberg, W. (2012). Marine actinomycetes: An ongoing source  
429 of novel bioactive metabolites. *Microbiol. Res.* *167*, 571–580.
- 430 42. Sun, Y., Takada, K., Nogi, Y., Okada, S., and Matsunaga, S. (2014). Lower homologues  
431 of ahpatinin, aspartic protease inhibitors, from a marine *Streptomyces* sp. *J. Nat. Prod.*  
432 *77*, 1749–1752.
- 433 43. Taylor, M.W., Radax, R., Steger, D., and Wagner, M. (2007). Sponge-Associated  
434 Microorganisms: Evolution, Ecology, and Biotechnological Potential. *Microbiol. Mol.*  
435 *Biol. Rev.* *71*, 295–347.
- 436 44. Thao, N.V., Nozawa, A., Obayashi, Y., Kitamura, S.-I., Yokokawa, T., and Suzuki, S.  
437 (2015). Extracellular proteases are released by ciliates in defined seawater microcosms.  
438 *Mar. Environ. Res.* *109*, 95–102.
- 439 45. Tripathi, V.R., Kumar, S., and Garg, S.K. (2011). A study on trypsin, *Aspergillus flavus*  
440 and *Bacillus* sp. protease inhibitory activity in *Cassia tora* (L.) syn *Senna tora* (L.) Roxb.  
441 seed extract. *BMC Complement. Altern. Med.* *11*, 56.
- 442 46. Trujillo, M.E. (2016). Actinobacteria. In ELS, (American Cancer Society), pp. 1–16.
- 443 47. Umezawa, H. (1976). [55] Structures and activities of protease inhibitors of microbial  
444 origin. In *Methods in Enzymology*, (Academic Press), pp. 678–695.
- 445 48. Valli, S., Suvathi, S.S., Aysha, O., Nirmala, P., Vinoth, K.P., and Reena, A. (2012).  
446 Antimicrobial potential of Actinomycetes species isolated from marine environment.  
447 *Asian Pac. J. Trop. Biomed.* *2*, 469–473.
- 448 49. Ward, A.C., and Bora, N. (2006). Diversity and biogeography of marine actinobacteria.  
449 *Curr. Opin. Microbiol.* *9*, 279–286.
- 450 50. Watve, M., Shejval, V., Sonawane, C., Rahalkar, M., Matapurkar, A., Shouche, Y.,  
451 Patole, M., Phadnis, N., Champhenkar, A., Damle, K., et al. (2000). The “K” selected  
452 oligophilic bacteria: a key to uncultured diversity? *Curr. Sci.* *78*, 1535–1542.
- 453 51. Watve, M., Tickoo, R., Jog, M., and Bhole, B. (2001). How many antibiotics are  
454 produced by the genus *Streptomyces*? *Arch. Microbiol.* *176*, 386–390.
- 455 52. Xie, C.-L., Xia, J.-M., Wang, J.-S., Lin, D.-H., and Yang, X.-W. (2018). Metabolomic  
456 Investigations on *Nesterenkonia flava* Revealed Significant Differences between Marine  
457 and Terrestrial Actinomycetes. *Mar. Drugs* *16*.
- 458 53. ZOBELL, C.E. (1941). Studies on marine bacteria, I: the cultural requirements of  
459 heterotrophic aerobes. *J Mar Res* *4*, 42–75.

460

461

462

463

464

465

466

467

468

469

470

471

472

473

474

475

476

477

478

479

480

481

482

483

484

485

486

**Fig 1:** Map of west coast of India (A) illustrating sampling sites along the coast of Maharashtra and Goa (B). Corresponding positions are shown in the inset (C & D). The maps were generated using QGIS software (<http://qgis.osgeo.org>) and Google maps.

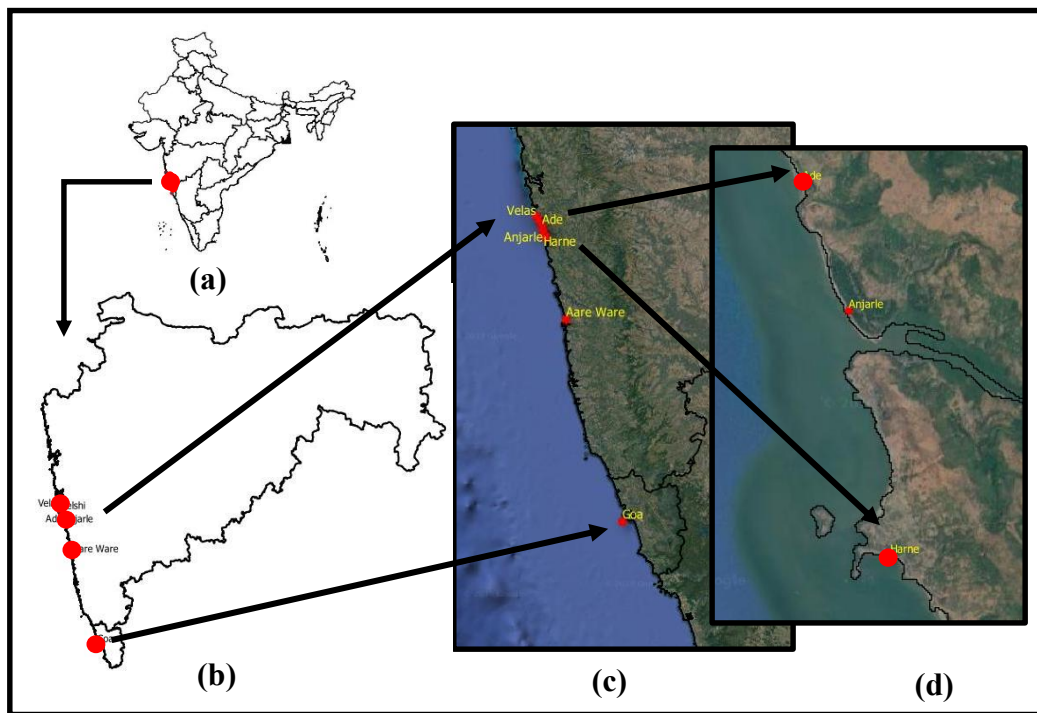

**Fig 2:** Phylogenetic relatedness of isolates in the study along with location, source of isolation and profile against different enzymes. Given is a maximum likelihood tree of actinobacteria used for screening of PIs. Outgroup taxa (*Bacillus* sp.) not shown. Percent bootstrap values of 1000 iterations are provided along the nodes. The figure also depicts location and source of isolation of the isolates along with their activity for production of PIs against subtilisin (SI), chymotrypsin (CI) and trypsin (TI) where (- : negative, positive and ++ : strong positive)

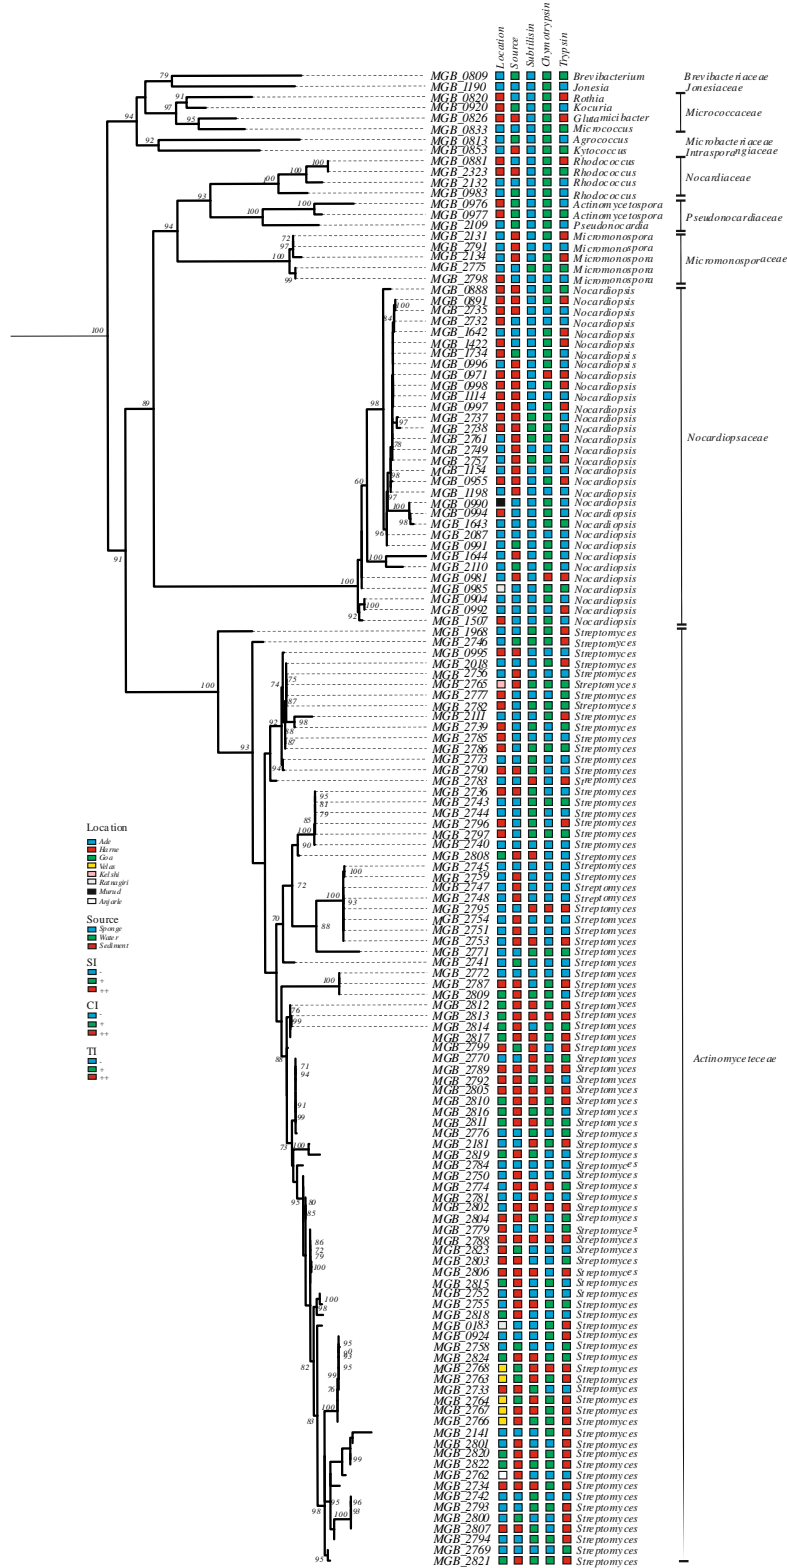

487

488

489  
490  
491  
492  
493  
494  
495  
496  
497  
498  
499  
500  
501  
502  
503

**Fig 3:** Spot assay representing PI activity against trypsin (A); and Venn diagram showing overlap of number of isolates producing subtilisin, chymotrypsin and trypsin inhibitors (B).

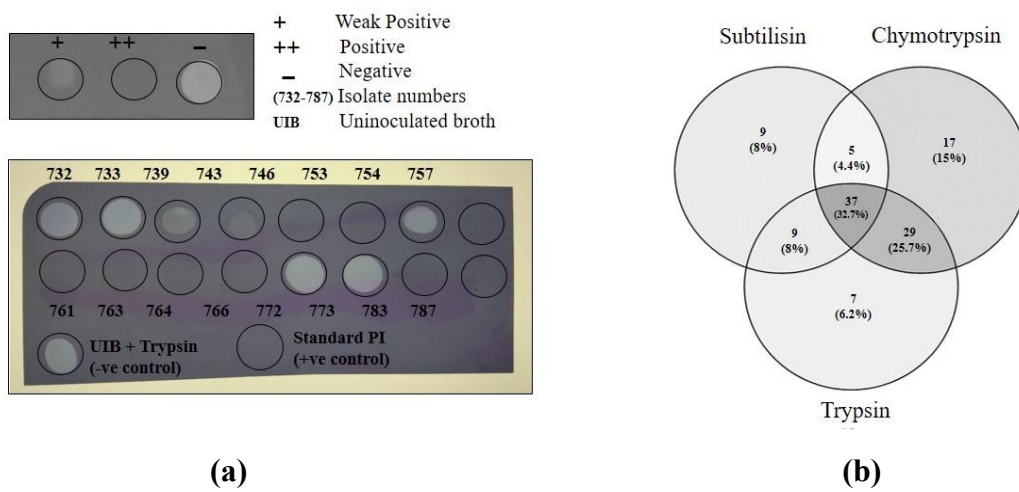

504  
505 **Fig 4:** Graphs showing number of actinobacterial isolates obtained from Ade and Harnai in different  
506 seasons (A) , number of isolates showing inhibitory activity against subtilisin (SI), chymotrypsin  
507 (CI) and trypsin (TI) is shown in (B) and number of isolates negative for PI production are shown  
508 in (C).  
509  
510  
511

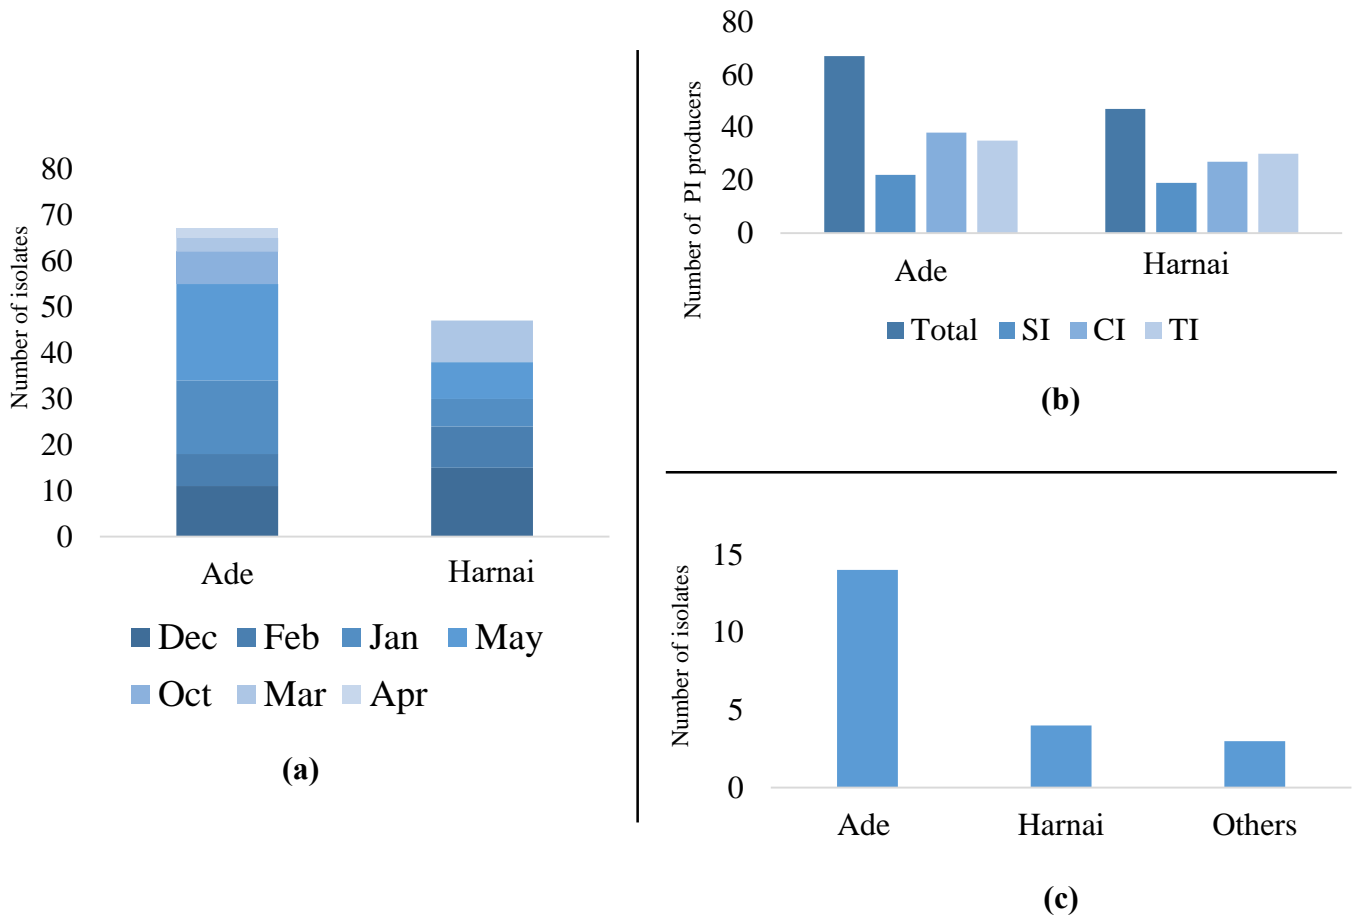

Source: https://www.biorxiv.org/content/10.1101/2020.02.14.949438.full.pdf
